# Supplementary material
Source: PubMed Central journal article supplement (PMC7288573)
Supplement: ao0c00263_si_001.pdf [file ao0c00263_si_001.pdf]

# Supporting Information

## Flexible Graphene-Assembled Film-Based Antenna for Wireless Wearable Sensor with Miniaturized Size and High Sensitivity

Jibo Zhang,<sup>§,†</sup> Rongguo Song,<sup>§,†</sup> Xin Zhao,<sup>†</sup> Ran Fang,<sup>†</sup> Bin Zhang,<sup>†</sup> Wei Qian,<sup>†</sup> Jingwei Zhang,<sup>†</sup> Chengguo Liu<sup>\*,†</sup> and Daping He<sup>\*,†,‡</sup>

<sup>†</sup>Hubei Engineering Research Center of RF-Microwave Technology and Application, School of Science, Wuhan University of Technology, Wuhan 430070, P. R. China

<sup>‡</sup>State Key Laboratory of Advanced Technology for Materials Synthesis and Processing, Wuhan University of Technology, Wuhan 430070, P. R. China

Corresponding Authors:

\*Chengguo Liu ([liucg@whut.edu.cn](mailto:liucg@whut.edu.cn)) and Daping He ([hedaping@whut.edu.cn](mailto:hedaping@whut.edu.cn))

Author Contributions:

<sup>§</sup>J.Z. and R.S. contributed equally to this work.

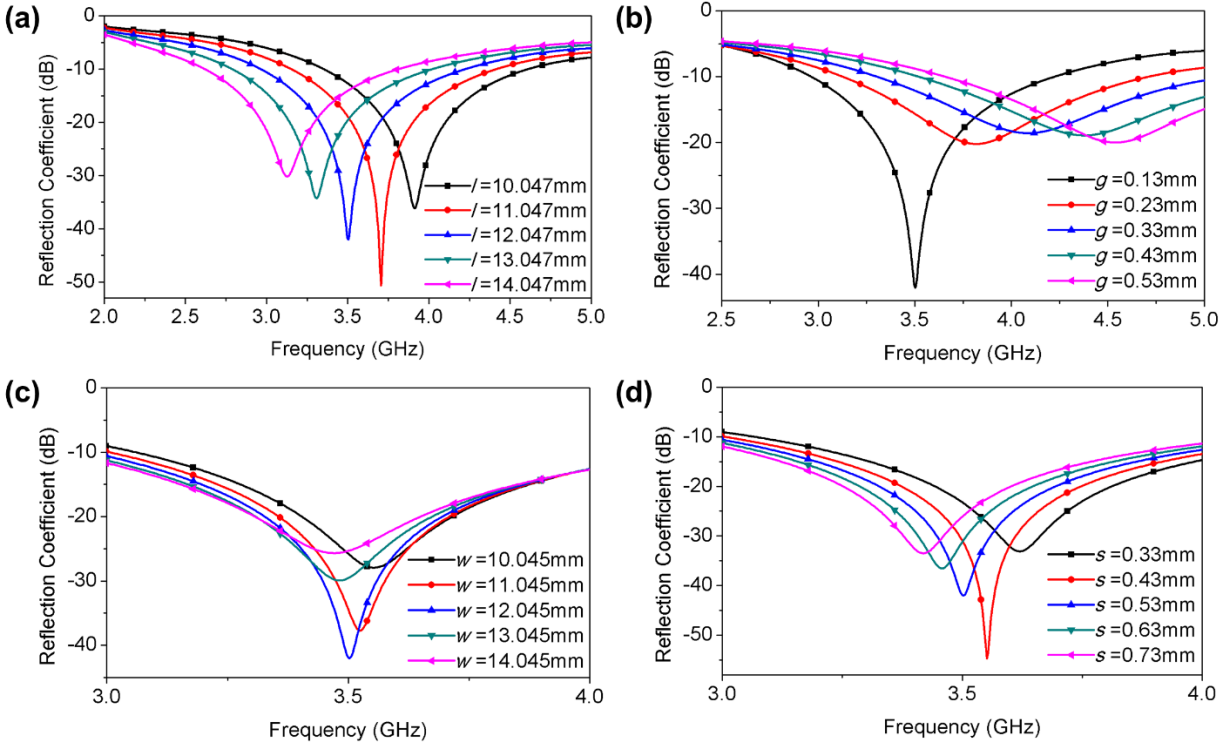

**Figure S1.** Simulation results of reflection coefficients of the antenna with different parameters.

(a) simulated reflection coefficient curves of the antenna with increasing  $l$  from 10.047 mm to 14.047 mm with a step of 1 mm. (b) simulated reflection coefficient curves of the antenna with increasing  $g$  from 0.13 mm to 0.53 mm with a step of 0.1 mm. (c) simulated reflection coefficient curves of the antenna with increasing  $w$  from 10.045 mm to 14.045 mm with a step of 1 mm. (d) simulated reflection coefficient curves of the antenna with increasing  $s$  from 0.33 mm to 0.73 mm with a step of 0.1 mm.

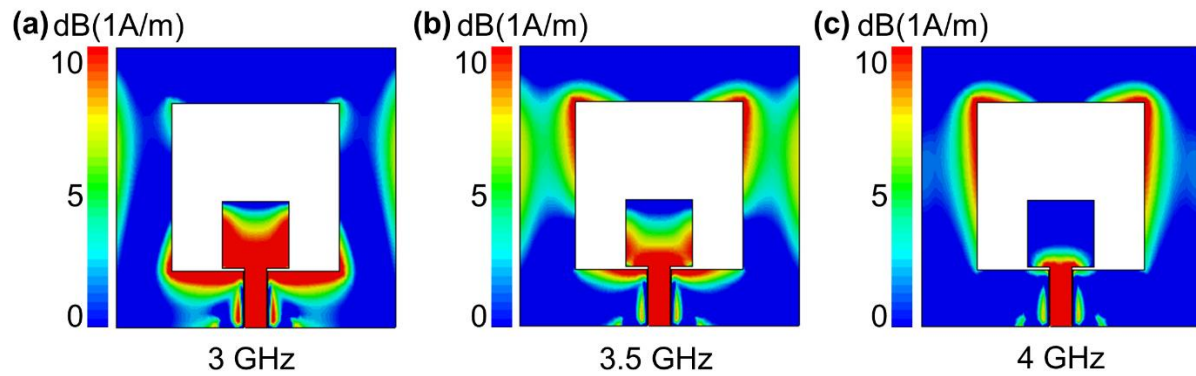

**Figure S2.** Simulation results of surface current of the antenna at different frequencies: (a) 3 GHz, (b) 3.5 GHz, (c) 4 GHz.

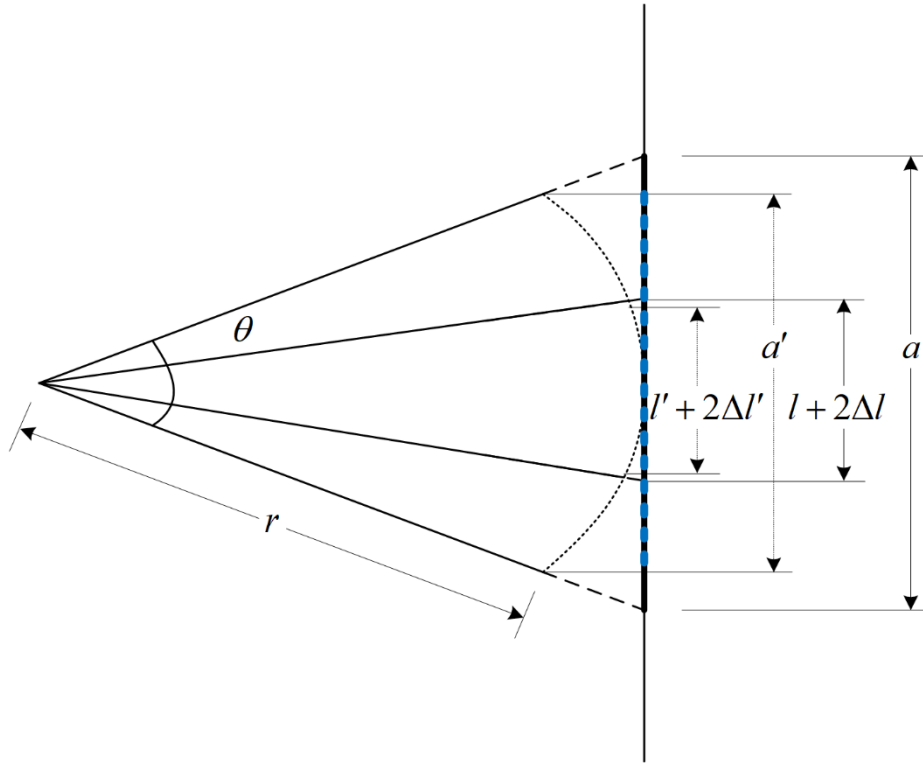

**Figure S3.** The geometric structures of the antenna before and after bending.

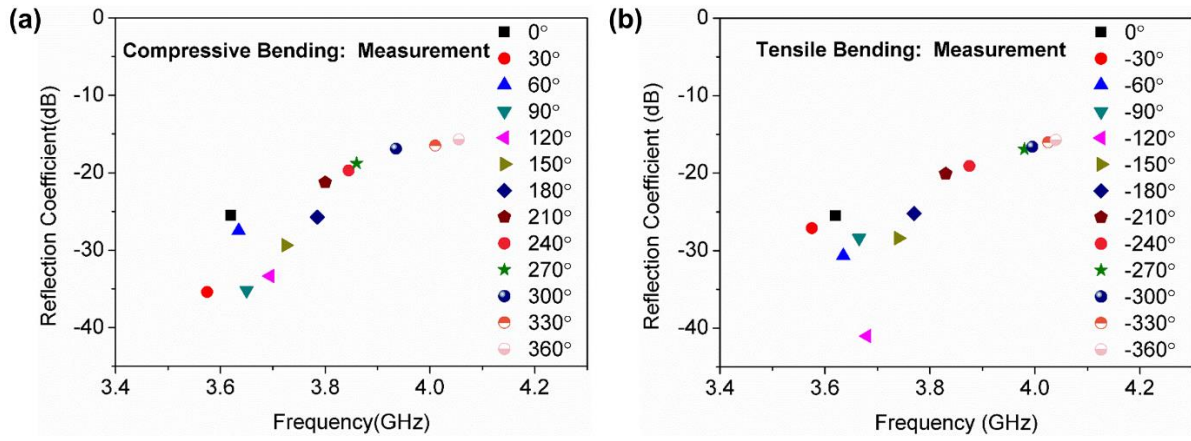

**Figure S4.** (a-b) Reflection coefficients of antenna with the central angle increasing from  $0^\circ$  to  $360^\circ$  with a step of  $30^\circ$  under compression (a) and tension (b), respectively.

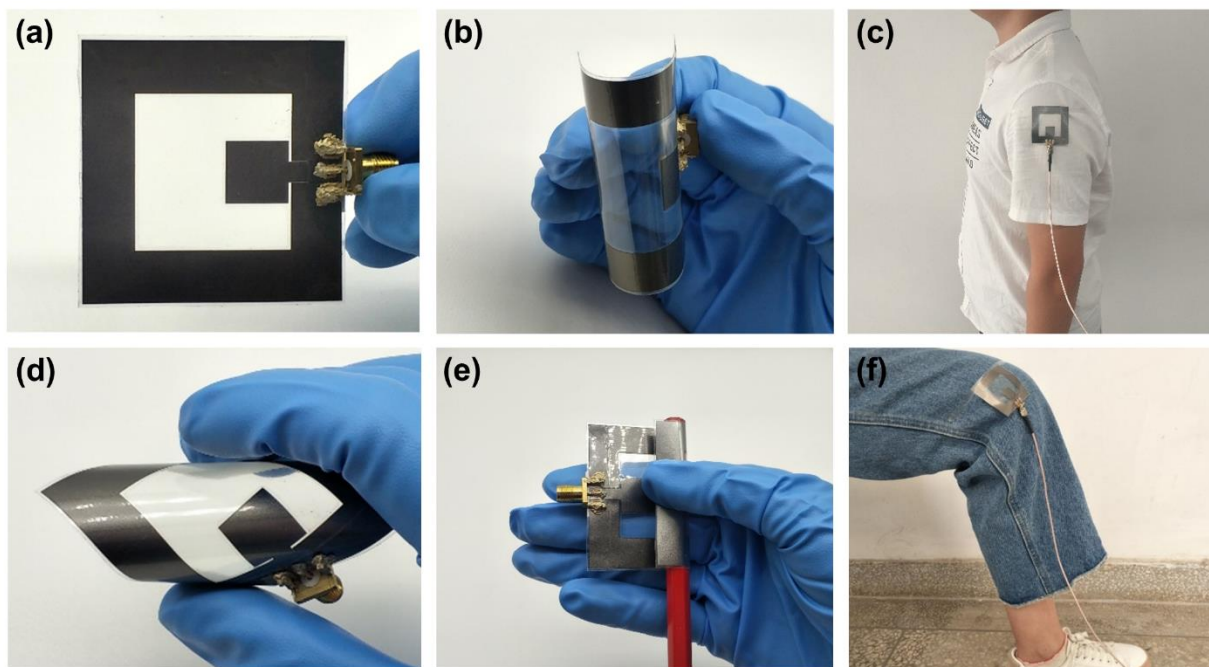

**Figure S5.** Photographs of a GAF antenna sensor in different statuses: (a) relaxed, (b) bent, (c) attached to the shoulder, (d) twisted, (e) rolled, and (f) attached to the knee.

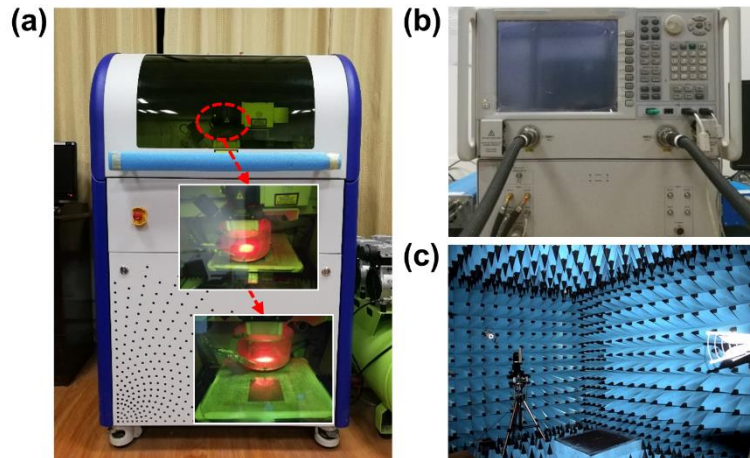

**Figure S6.** Fabrication device and measurement environment. (a) Laser direct molding engraving machine (LPKF ProtoLaser S) used to manufacture the antenna. (b-c) Keysight N5247A network analyzer (b) and microwave anechoic chamber (c) used to obtain reflection coefficient, frequency bandwidth, and radiation pattern.

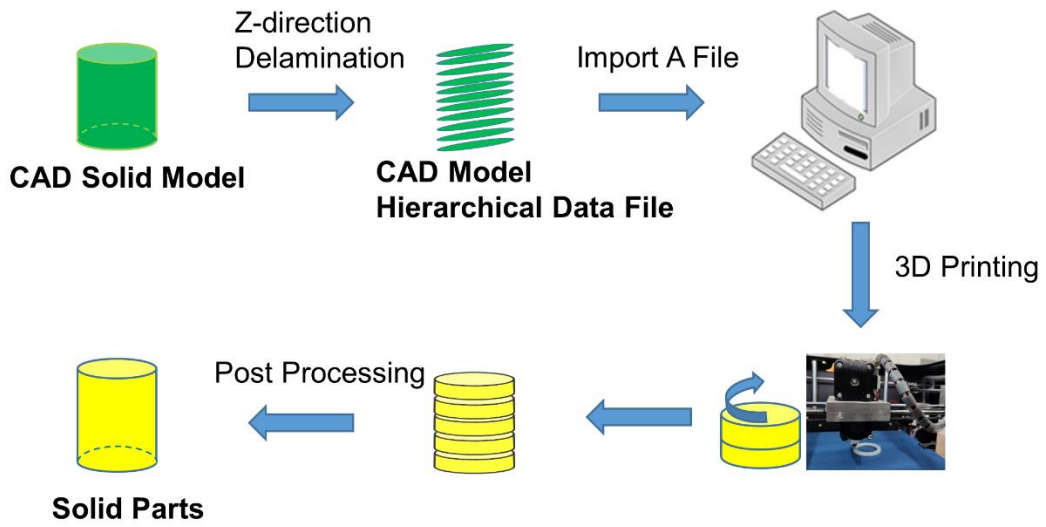

**Figure S7.** Fabrication scheme of polylactic acid fixture using 3D printing.
